# Supplementary material for: The potential of open-access data for flood estimations: uncovering inundation hotspots in Ho Chi Minh City, Vietnam, through a normalized flood severity index
Source: Copernicus journal article supplement (doi:10.5194/nhess-23-2313-2023), 2023-06-26
Supplement: Supplementary file 1 [file nhess-23-2313-2023-supplement.pdf]

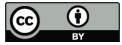

*Supplement of*

**The potential of open-access data for flood estimations: uncovering inundation hotspots in Ho Chi Minh City, Vietnam, through a normalized flood severity index**

**Leon Scheiber et al.**

*Correspondence to:* Leon Scheiber ([scheiber@lufi.uni-hannover.de](mailto:scheiber@lufi.uni-hannover.de))

The copyright of individual parts of the supplement might differ from the article licence.

## Supplementary Material S1: List of freely available DEMs

**Table S1: A list of freely available DEMs along with their different versions, their issuers and their date of issuance as well as their resolution and vertical accuracy.**

| Freely Available Satellite DEMs |         |                                                             |                  |                       |                                                      |
|---------------------------------|---------|-------------------------------------------------------------|------------------|-----------------------|------------------------------------------------------|
| Name                            | Version | Issuer with Link (Reference)                                | Publication Date | Horizontal Resolution | Vertical Accuracy                                    |
| SRTM                            | 1       | <a href="#">NASA</a><br>(EROS, 2018)                        | 2004             | 3-arcsecond           | 16 m absolute error (Globe)<br>(Farr et al., 2007)   |
|                                 | 2.1     |                                                             | 2005             | 3-arcsecond           |                                                      |
|                                 | 3       |                                                             | 2013             | 1-arcsecond           |                                                      |
| ALOS                            | 1       | <a href="#">JAXA</a><br>(OpenTopography, 2016)              | 2015             | 1-arcsecond           | 4.10 m RMSE (Globe)<br>(Tadono et al., 2015)         |
|                                 | 2       |                                                             | 2017             | 1-arcsecond           |                                                      |
|                                 | 3       |                                                             | 2020             | 1-arcsecond           |                                                      |
| ASTER                           | 1       | <a href="#">NASA/METI</a><br>(ASTER)                        | 2009             | 1-arcsecond           | 9.34 m RMSE (US)<br>(Gesch et al., 2012)             |
|                                 | 2       |                                                             | 2011             | 1-arcsecond           | 8.68 m RMSE (US)<br>(Gesch et al., 2012)             |
|                                 | 3       |                                                             | 2016             | 1-arcsecond           | 8.52 m RMSE (US)<br>(Gesch et al., 2016)             |
| COPERNICUS                      | 1       | <a href="#">ESA</a><br>(Copernicus DEM, 2019)               | 2019             | 1-arcsecond           | <4 m absolute error<br>(Copernicus DEM, 2019)        |
| CoastalDEM                      | 1.1     | <a href="#">Climate Central</a><br>(Kulp and Strauss, 2018) | 2018             | 3-arcsecond           | 4.02 m RMSE (Globe <5 m)<br>(Kulp and Strauss, 2021) |
|                                 | 2.1     |                                                             | 2022             | 3-arcsecond           | 2.63 m RMSE (Globe <5 m)<br>(Kulp and Strauss, 2021) |
| FABDEM                          | 1.0     | <a href="#">Fathom Global</a><br>(Hawker et al., 2022)      | 2022             | 1-arcsecond           | <2.88 m absolute error<br>(Hawker et al., 2022)      |
|                                 | 1.2     |                                                             | 2023             | 1-arcsecond           |                                                      |

## Supplementary Material S2: Processing of terrain data

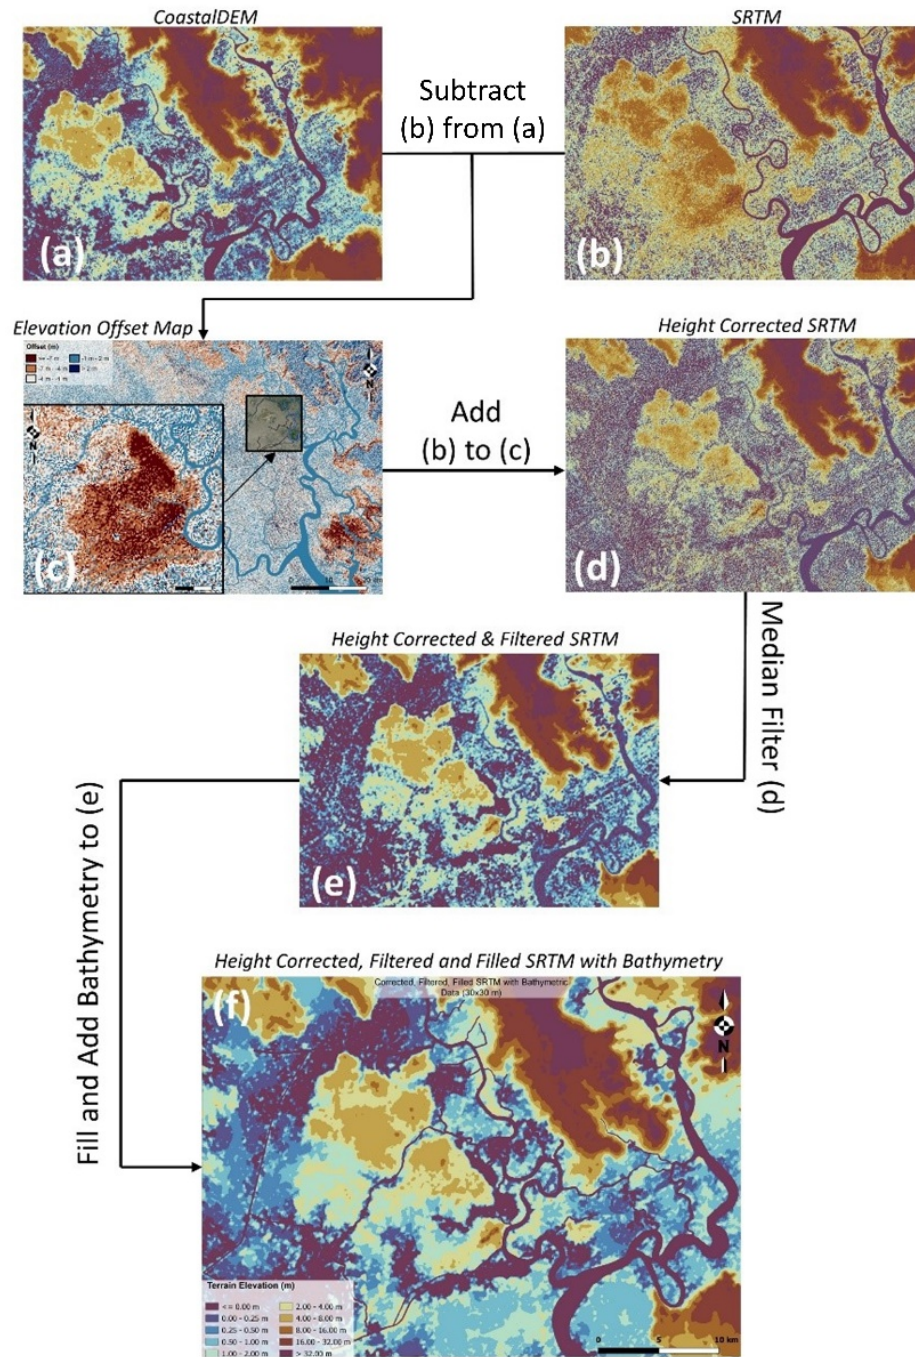

Figure S2. TERRAIN DATA: (a) represents the CoastalDEM, which is subtracted from the SRTM shown in (b) to produce the elevation offset map presented in (c). (d) is the result of adding (b) to (c). (e) depicts the result of the 3×3 2D median filter, which was then filled and enriched with bathymetric data, leading to the final elevation model shown in (f). Topographic data visualized using scientific color maps created by Crameri (2021).

### Supplementary Material S3: Characteristics of the LiDAR data

Generating Software: 'TerraScan'  
Number of Point Records: 51401717  
Scale Factor X Y Z: 0.00100000 0.00100000 0.001  
Offset X Y Z: 672194.312 1183851.815 0.000  
Min X Y Z: 672194.314 1183851.817 -28.630  
Max X Y Z: 674199.100 1185856.582 62.480  
ProjectedCSType: PCS\_WGS84\_UTM\_zone\_48N  
Bounding Box: 672194.314, 1183851.817, 674199.100, 1185856.582

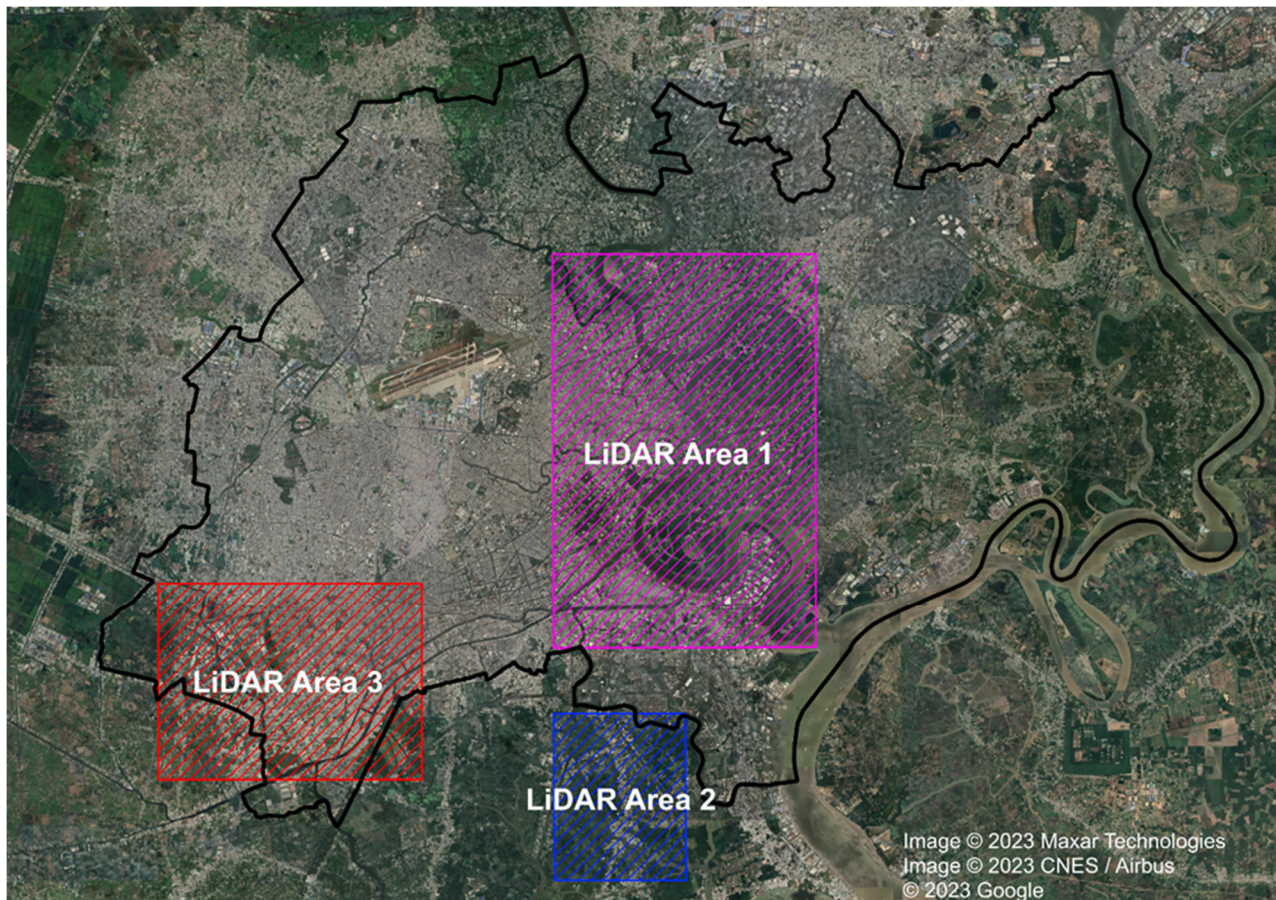

Figure S3. LIDAR DATA: Locations of the acquired LiDAR samples.

**Supplementary Material S4: Comparison for globale DEMs and LiDAR**

**Table S4: Comparison of LiDAR height data with global digital elevation models.**

| <b>Generated DEM</b> |                             |                                |                       |                                   |                               |
|----------------------|-----------------------------|--------------------------------|-----------------------|-----------------------------------|-------------------------------|
| <b>LiDAR Area</b>    | <b>Area (m<sup>2</sup>)</b> | <b>Absolute Mean Error (m)</b> | <b>Mean Error (m)</b> | <b>Root Mean Square Error (m)</b> | <b>Standard Deviation (m)</b> |
| <b>1</b>             | 96                          | 0.80                           | -0.52                 | 0.96                              | 0.81                          |
| <b>2</b>             | 21                          | 0.62                           | -0.39                 | 0.75                              | 0.64                          |
| <b>3</b>             | 48                          | 0.80                           | -0.38                 | 0.95                              | 0.86                          |
| <b>Total</b>         | 165                         | 0.77                           | -0.45                 | 0.93                              | 0.81                          |

| <b>CoastalDEMv1</b> |                             |                                |                       |                                   |                               |
|---------------------|-----------------------------|--------------------------------|-----------------------|-----------------------------------|-------------------------------|
| <b>LiDAR Area</b>   | <b>Area (m<sup>2</sup>)</b> | <b>Absolute Mean Error (m)</b> | <b>Mean Error (m)</b> | <b>Root Mean Square Error (m)</b> | <b>Standard Deviation (m)</b> |
| <b>1</b>            | 96                          | 1.34                           | -1.00                 | 1.80                              | 1.50                          |
| <b>2</b>            | 21                          | 4.58                           | -1.10                 | 1.70                              | 1.40                          |
| <b>3</b>            | 48                          | 1.22                           | -0.73                 | 1.60                              | 1.40                          |
| <b>Total</b>        | 165                         | 1.28                           | -0.91                 | 1.71                              | 1.45                          |

| <b>SRTM</b>       |                             |                                |                       |                                   |                               |
|-------------------|-----------------------------|--------------------------------|-----------------------|-----------------------------------|-------------------------------|
| <b>LiDAR Area</b> | <b>Area (m<sup>2</sup>)</b> | <b>Absolute Mean Error (m)</b> | <b>Mean Error (m)</b> | <b>Root Mean Square Error (m)</b> | <b>Standard Deviation (m)</b> |
| <b>1</b>          | 96                          | 2.47                           | 1.28                  | 3.30                              | 3.07                          |
| <b>2</b>          | 21                          | 8.40                           | 0.98                  | 3.50                              | 3.33                          |
| <b>3</b>          | 48                          | 2.50                           | 1.20                  | 3.20                              | 3.03                          |
| <b>Total</b>      | 165                         | 2.50                           | 1.20                  | 3.30                              | 3.10                          |

| <b>ALOS</b>       |                             |                                |                       |                                   |                               |
|-------------------|-----------------------------|--------------------------------|-----------------------|-----------------------------------|-------------------------------|
| <b>LiDAR Area</b> | <b>Area (m<sup>2</sup>)</b> | <b>Absolute Mean Error (m)</b> | <b>Mean Error (m)</b> | <b>Root Mean Square Error (m)</b> | <b>Standard Deviation (m)</b> |
| <b>1</b>          | 96                          | 4.14                           | 4.01                  | 5.30                              | 3.47                          |
| <b>2</b>          | 21                          | 14.10                          | 1.98                  | 2.90                              | 2.16                          |
| <b>3</b>          | 48                          | 3.10                           | 2.70                  | 4.31                              | 3.30                          |
| <b>Total</b>      | 165                         | 2.50                           | 3.20                  | 4.60                              | 3.30                          |

| <b>ASTER</b>      |                             |                                |                       |                                   |                               |
|-------------------|-----------------------------|--------------------------------|-----------------------|-----------------------------------|-------------------------------|
| <b>LiDAR Area</b> | <b>Area (m<sup>2</sup>)</b> | <b>Absolute Mean Error (m)</b> | <b>Mean Error (m)</b> | <b>Root Mean Square Error (m)</b> | <b>Standard Deviation (m)</b> |
| <b>1</b>          | 96                          | 7.06                           | 7.03                  | 7.65                              | 2.99                          |
| <b>2</b>          | 21                          | 24.12                          | 7.33                  | 8.06                              | 2.54                          |
| <b>3</b>          | 48                          | 7.41                           | 7.65                  | 8.15                              | 2.92                          |
| <b>Total</b>      | 165                         | 7.35                           | 7.34                  | 7.89                              | 2.92                          |

| <b>Copernicus</b> |                             |                                |                       |                                   |                               |
|-------------------|-----------------------------|--------------------------------|-----------------------|-----------------------------------|-------------------------------|
| <b>LiDAR Area</b> | <b>Area (m<sup>2</sup>)</b> | <b>Absolute Mean Error (m)</b> | <b>Mean Error (m)</b> | <b>Root Mean Square Error (m)</b> | <b>Standard Deviation (m)</b> |
| <b>1</b>          | 96                          | 4.02                           | 4.00                  | 4.65                              | 2.37                          |
| <b>2</b>          | 21                          | 13.75                          | 2.42                  | 2.86                              | 1.52                          |
| <b>3</b>          | 48                          | 3.17                           | 3.14                  | 3.77                              | 2.09                          |
| <b>Total</b>      | 165                         | 3.48                           | 3.46                  | 4.12                              | 2.24                          |

| <b>CoastalDEMv2</b> |                             |                                |                       |                                   |                               |
|---------------------|-----------------------------|--------------------------------|-----------------------|-----------------------------------|-------------------------------|
| <b>LiDAR Area</b>   | <b>Area (m<sup>2</sup>)</b> | <b>Absolute Mean Error (m)</b> | <b>Mean Error (m)</b> | <b>Root Mean Square Error (m)</b> | <b>Standard Deviation (m)</b> |
| <b>1</b>            | 96                          | 2.22                           | 2.17                  | 2.46                              | 1.18                          |
| <b>2</b>            | 21                          | 7.59                           | 1.47                  | 1.75                              | 0.96                          |
| <b>3</b>            | 48                          | 2.12                           | 2.12                  | 2.28                              | 0.85                          |
| <b>Total</b>        | 165                         | 2.08                           | 2.05                  | 2.31                              | 1.07                          |

| <b>FABDEM</b>     |                             |                                |                       |                                   |                               |
|-------------------|-----------------------------|--------------------------------|-----------------------|-----------------------------------|-------------------------------|
| <b>LiDAR Area</b> | <b>Area (m<sup>2</sup>)</b> | <b>Absolute Mean Error (m)</b> | <b>Mean Error (m)</b> | <b>Root Mean Square Error (m)</b> | <b>Standard Deviation (m)</b> |
| <b>1</b>          | 96                          | 1.68                           | 1.67                  | 2.04                              | 1.18                          |
| <b>2</b>          | 21                          | 2.16                           | 0.95                  | 1.29                              | 0.88                          |
| <b>3</b>          | 48                          | 1.51                           | 1.49                  | 1.69                              | 0.78                          |
| <b>Total</b>      | 165                         | 1.41                           | 1.37                  | 1.75                              | 1.08                          |

**Supplementary Material S5: Processing of bathymetric data**

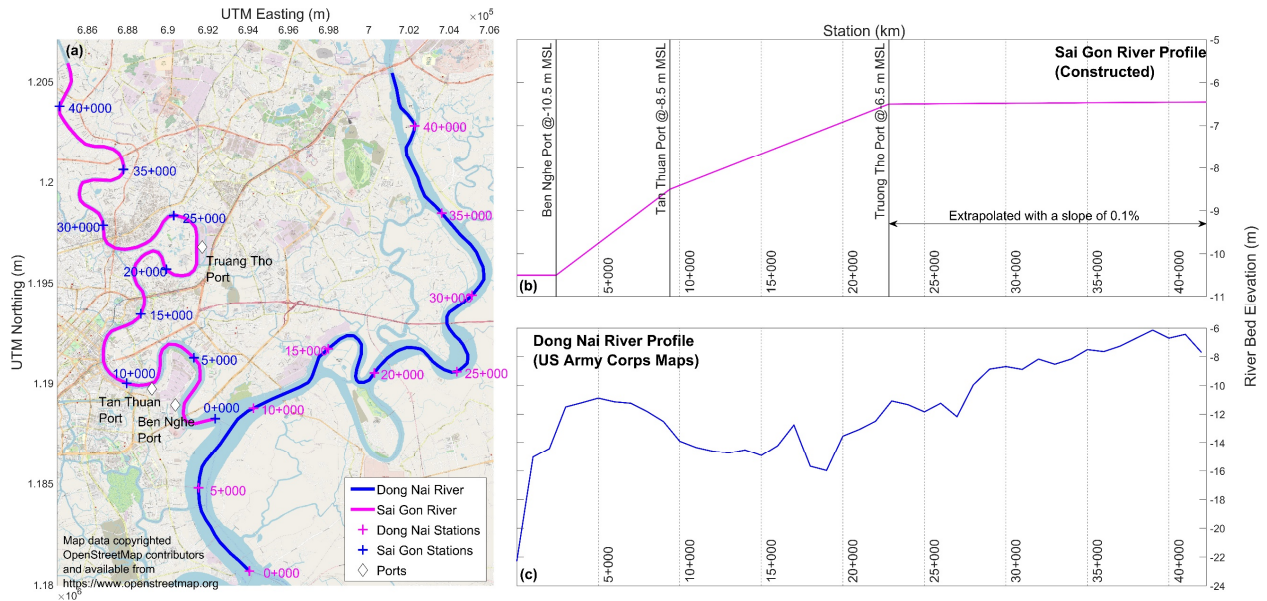

**Figure S5. RIVER BATHYMETRY:** (a) shows the location of the ports used to determine the depth of the Sai Gon River as well as the stationing for the river bed elevation. (b) and (c) show the constructed Sai Gon River and digitized Dong Nai River longitudinal profiles, respectively.

**Supplementary Material S6: Comparison of measured and extrapolated water levels at Nha Be station**

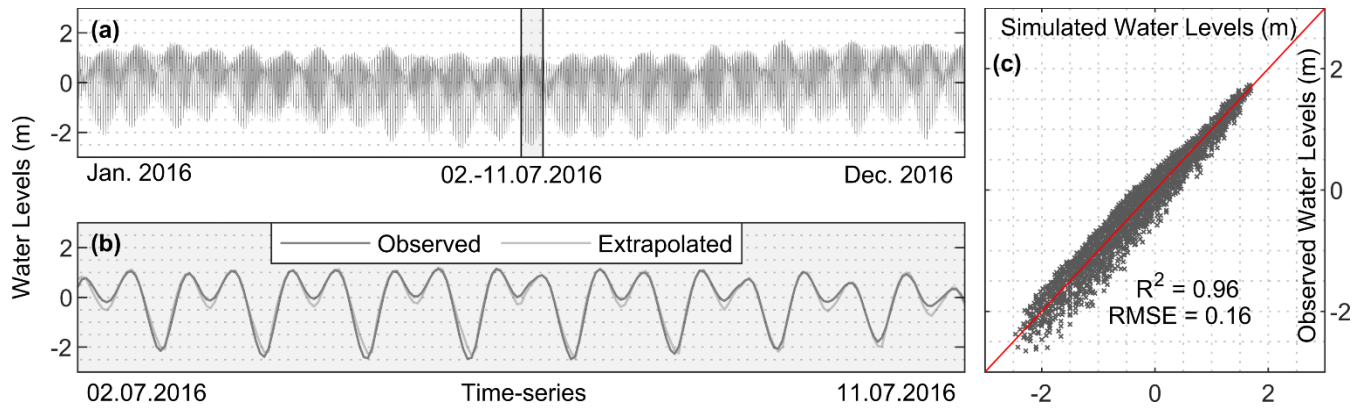

**Figure S6. WATER-LEVEL COMPARISON** (a) Time series of the Nha Be tidal gauge for 2016 versus data from Vung Tau after adjusting by a scaling factor of 1.05 and removing the temporal phase shift of 1.8 hrs. (b) Exemplary section of the same time series illustrating the fit of tidal high-water levels. (c) Linear regression for all hourly data points and corresponding quality estimates  $R^2$  and RMSE.



**Supplementary Material S7: Determination of flooding threshold (media examples, all accessed in Feb. 2023)**

[https://openjicareport.jica.go.jp/618/618\\_123.html](https://openjicareport.jica.go.jp/618/618_123.html)

<https://www.c40.org/case-studies/mitigate-urban-flooding-in-ho-chi-minh-city-phase-1/>

<https://global.royalhaskoningdhv.com/projects/flood-management-in-ho-chi-minh-city-vietnam>

<https://borneobulletin.com.bn/poor-urban-development-cause-of-flooding-congestion-in-ho-chi-minh-say-experts/>

<https://e.vnexpress.net/news/news/major-anti-flooding-project-in-hcmc-misses-deadline-for-four-years-4444006.html>

<https://www.channelnewsasia.com/cnainsider/siege-climate-man-made-problems-sinking-ho-chi-minh-city-floods-2052231>

## Supplementary Material S8: Model validation data

Table S8.1: Reported vs. simulated flood depths

| ID  | Reported Flood Depth (m) | Simulated Flood Depth (m) | ID       | Reported Flood Depth (m) | Simulated Flood Depth (m) | ID        | Reported Flood Depth (m) | Simulated Flood Depth (m) |
|-----|--------------------------|---------------------------|----------|--------------------------|---------------------------|-----------|--------------------------|---------------------------|
| 1   | 0.10                     | 0.15                      | 10       | 0.20                     | 0.20                      | 19        | 0.25                     | 0.25                      |
| 2   | 0.10                     | 0.10                      | 11       | 0.20                     | 0.25                      | 20        | 0.25                     | 0.15                      |
| 3   | 0.15                     | 0.20                      | 12       | 0.20                     | 0.15                      | 21        | 0.30                     | 0.25                      |
| 4   | 0.15                     | 0.20                      | 13       | 0.20                     | 0.20                      | 22        | 0.30                     | 0.30                      |
| 5   | 0.15                     | 0.15                      | 14       | 0.20                     | 0.20                      | 23        | 0.30                     | 0.25                      |
| 6   | 0.20                     | 0.20                      | 15       | 0.20                     | 0.20                      | 24        | 0.35                     | 0.30                      |
| 7   | 0.20                     | 0.20                      | 16       | 0.20                     | 0.20                      | 25        | 0.40                     | 0.40                      |
| 8   | 0.20                     | 0.15                      | 17       | 0.20                     | 0.20                      |           |                          |                           |
| 9   | 0.20                     | 0.20                      | 18       | 0.25                     | 0.20                      |           |                          |                           |
| NSE |                          | 0.70                      | RMSE (m) |                          | 0.03                      | PBIAS (%) |                          | 4                         |

Table S8.2: Street names for model validation locations

| ID | Street Name                      | ID | Street Name                | ID | Street Name         |
|----|----------------------------------|----|----------------------------|----|---------------------|
| 1  | Hem 42/51 Tran Dai Nghia         | 10 | Hem 2/3 Lo Siue            | 19 | Duong Hong Ha       |
| 2  | Duong An Duong Vuong             | 11 | Duong Luong Minh Nguyet    | 20 | Binh Quai           |
| 3  | Ben Lo Gom                       | 12 | Hem 174 Thai Phien         | 21 | Song Hanh QL22      |
| 4  | Hem 851/935 Duong Huynh Tan Phat | 13 | Duong Hoa Binh             | 22 | Duong Duong Van Cam |
| 5  | Duong Thap Muoi                  | 14 | Duong Trinh Dinh Trong     | 23 | Duong Le Loi        |
| 6  | Duong Pham Huu Chi               | 15 | Hem 710 Duong Luy Ban Bich | 24 | Duong So 1          |
| 7  | Hem 336 Nguyen Van Luong         | 16 | Bau Cat                    | 25 | Duong D             |
| 8  | Hem 63 Luu Trong Lu              | 17 | Duong Hoa Bang             |    |                     |
| 9  | Duong Dang Nguyen Can            | 18 | Tran Quoc Toan             |    |                     |

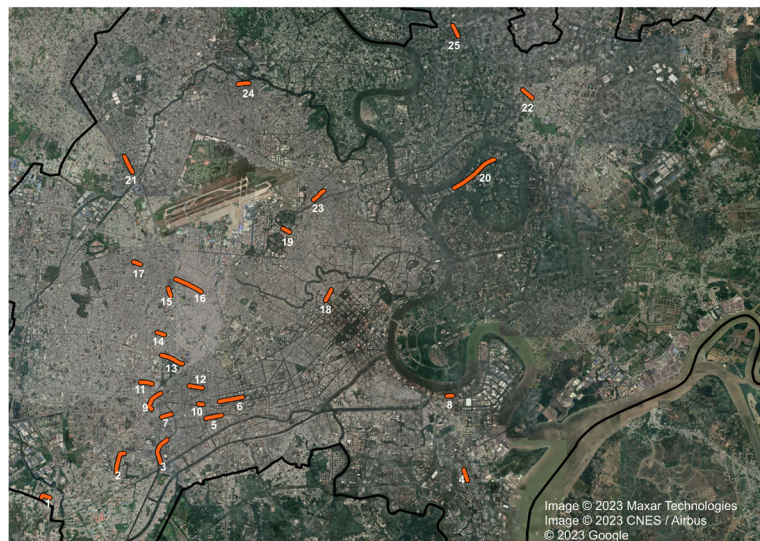

Figure S8. REPORTED INUNDATIONS: Location of flooded streets used for model validation.
